# Supplementary material
Source: PubMed Central journal article supplement (PMC5940517)
Supplement: NIHMS950663-supplement-1.pdf [file NIHMS950663-supplement-1.pdf]

## S Figure 1

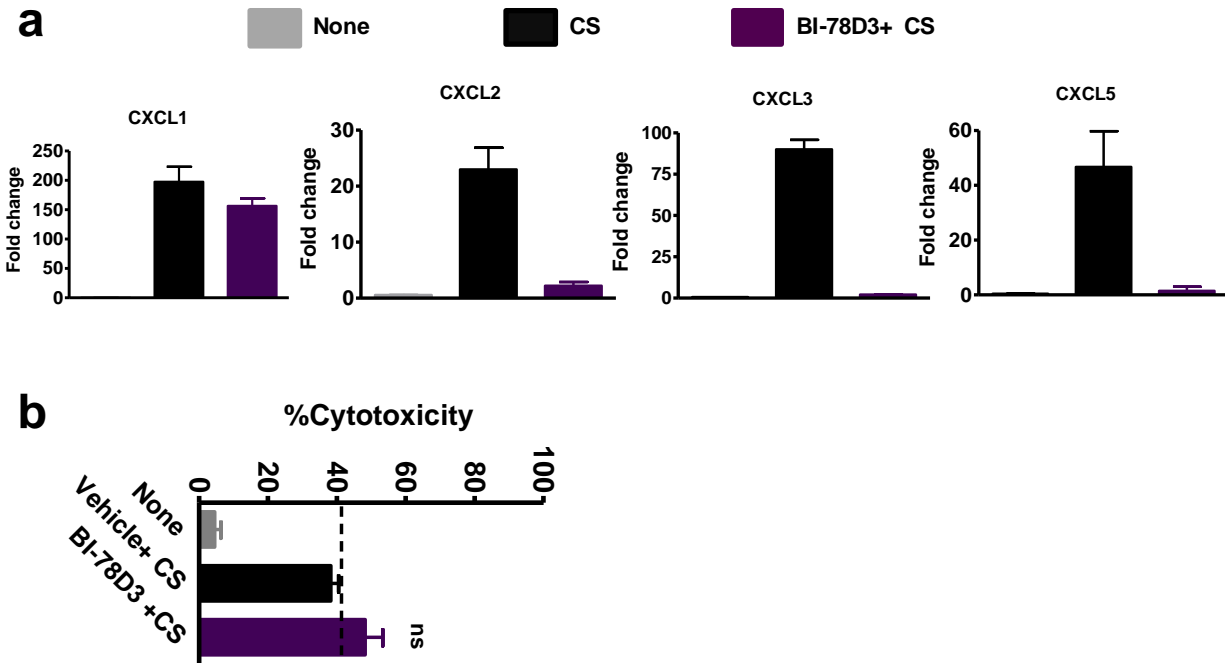

**Supplementary Figure 1. Effect of BI-78D3 on CXC chemokine expression and cytotoxicity.** (a) Quantitative real time PCR of neutrophil-active chemokines was performed in the presence and absence of BI-78D3 in LPS-primed BMDM, 6h post exposure to CS. (b) Cytotoxic effects of BI-78D3 was measured by addition of 3-[4,5-dimethylthiazol-2-yl] 2,5-diphenyl-tetrazolium bromide (MTT) post CS-treatment. After 2h, absorbance was measured at 562 nm using a BioTek reader.

## S Figure 2

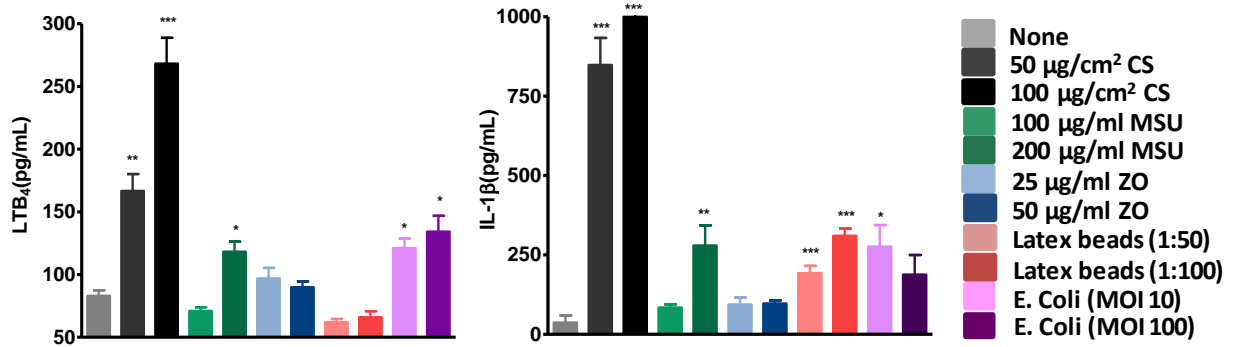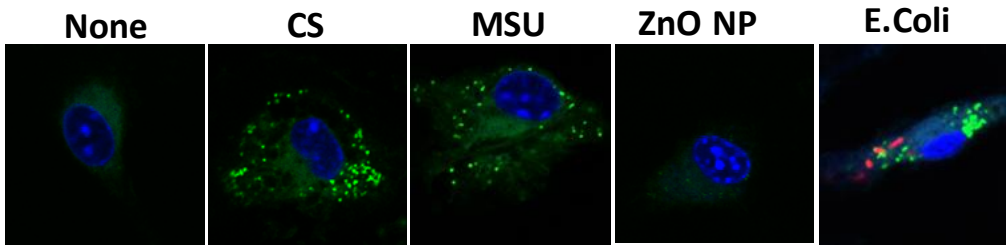

**Supplementary Figure 2. LTB<sub>4</sub> production and lipidosome formation with other phagocytic particles.** LPS-primed BMDMs were stimulated with 100 μg/cm<sup>2</sup> CS, 100 μg/ml and 200 μg/ml MSU, 25 μg/ml and 50 μg/ml zinc oxide particles, latex beads and mCherry E.Coli. (a) The supernatant was collected after 6 h, LTB<sub>4</sub> and IL-1β was measured using ELISA. (b) The cells were stained with BODIPY (green) and DAPI (blue).

## S Figure 3

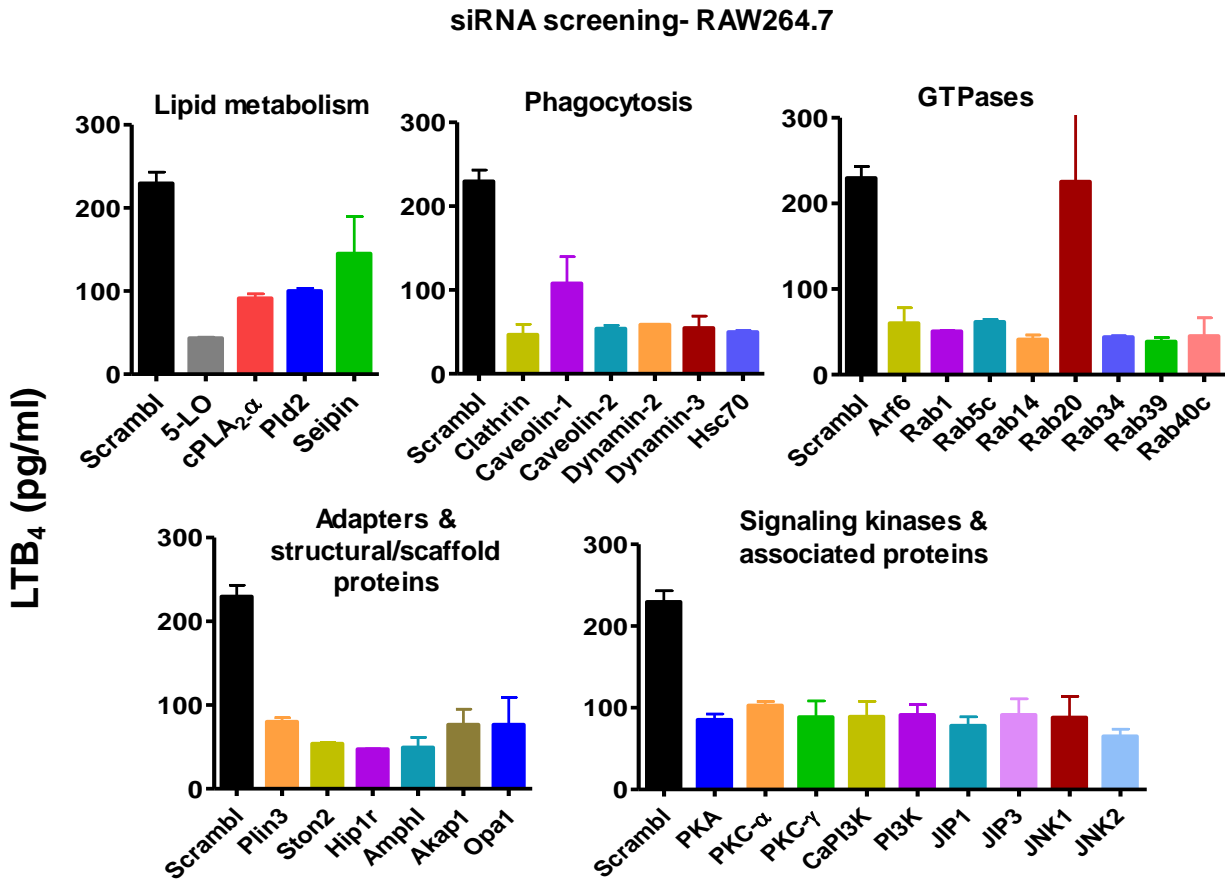

### Supplementary Figure 3. Molecular mediators of CS-induced LTB<sub>4</sub> production.

RAW 264.7 cells were incubated with various siRNA as indicated for 48h. These cells were LPS-primed, stimulated with CS (100µg/cm<sup>2</sup>) and LTB<sub>4</sub> in culture supernatants were measured after 6h. Data represent average inhibition of LTB<sub>4</sub> production by at least two siRNA for each gene and are representative of at least two independent experiments.
